# Supplementary material for: Waste-based value-added feedstocks from tire pyrolysis oil distillation: defossilization of the petrochemical industry
Source: Royal Society of Chemistry journal article supplement (doi:10.1039/d4gc05185h), 2024-12-03
Supplement: d4gc05185h1.pdf [file d4gc05185h1.pdf]

# Waste-based value-added feedstocks from tire pyrolysis oil distillation: defossilization of the petrochemical industry

## Supplementary Information

**Juan Daniel Martínez, Alberto Veses, Alberto Sanchís, Andreas Kapf, José Manuel López, María Soledad Callén, Tomás García, Ramón Murillo**

Instituto de Carboquímica (ICB-CSIC), Miguel Luesma Castán 4, 50018 Zaragoza, Spain.

Pyrum Innovations AG, Dieselstraße 8, D-66763 Dillingen, Germany.

## Tables

**Table S1. Experimental campaign and detailed GC characterization of the light fraction**

| Run | Temp. Reboiler (°C) | RR  | LTT (wt%) |          |                |              |                    |       |           |
|-----|---------------------|-----|-----------|----------|----------------|--------------|--------------------|-------|-----------|
|     |                     |     | Benzen e  | Toluen e | Ethyl- benzene | p+m- Xylen e | Styrene + o-Xylene | BTEX  | Limonen e |
| 1   | 190                 | --- | 19.51     | 47.65    | 3.18           | 8.33         | 1.47               | 80.14 | 0.01      |
| 2   | 210                 | --- | 14.35     | 40.19    | 6.31           | 18.16        | 4.22               | 83.20 | 0.05      |
| 3   | 230                 | --- | 11.98     | 34.15    | 6.49           | 20.29        | 5.68               | 78.60 | 0.12      |
| 4   | 250                 | --- | 9.71      | 28.52    | 5.95           | 18.57        | 5.47               | 68.20 | 0.26      |
| 5   | 270                 | --- | 8.95      | 26.23    | 5.47           | 17.37        | 5.21               | 63.20 | 0.23      |
| 6   | 190                 | 1.5 | ---       | ---      | ---            | ---          | ---                | ---   | ---       |
| 7   | 210                 | 1.5 | 14.25     | 41.33    | 6.75           | 19           | 4.19               | 85.50 | 0.02      |
| 8   | 230                 | 1.5 | 11.73     | 33.53    | 6.71           | 20.66        | 5.49               | 78.10 | 0.03      |
| 9   | 250                 | 1.5 | 10.18     | 29.11    | 5.91           | 18.52        | 5.13               | 68.90 | 0.09      |
| 10  | 270                 | 1.5 | 10.59     | 29.95    | 5.85           | 18.77        | 5.23               | 70.40 | 0.08      |

**Table S2. Experimental campaign and detailed GC characterization of the heavy fraction**

| Run | Temp. Reboiler (°C) | RR  | HTT (wt%) |          |                |              |                    |       |           |
|-----|---------------------|-----|-----------|----------|----------------|--------------|--------------------|-------|-----------|
|     |                     |     | Benzen e  | Toluen e | Ethyl- benzene | p+m- Xylen e | Styrene + o-Xylene | BTEX  | Limonen e |
| 1   | 190                 | --- | 0.64      | 1.89     | 3.22           | 9.42         | 3.09               | 18.26 | 0.19      |
| 2   | 210                 | --- | 0.63      | 1.53     | 0.99           | 5.48         | 2.74               | 11.37 | 0.51      |
| 3   | 230                 | --- | 0.44      | 1.27     | 1.34           | 1.55         | 0.93               | 5.53  | 0.44      |
| 4   | 250                 | --- | 0.27      | 1.28     | 0.52           | 1.78         | 0.64               | 4.49  | 0.12      |
| 5   | 270                 | --- | 0.04      | 0.20     | 0.10           | 0.39         | 0.16               | 0.89  | 0.08      |

|    |     |     |      |      |      |      |      |      |      |
|----|-----|-----|------|------|------|------|------|------|------|
| 6  | 190 | 1.5 | ---  | ---  | ---  | ---  | ---  | ---  | ---  |
| 7  | 210 | 1.5 | 0.21 | 1.52 | 1.24 | 2.74 | 1.88 | 7.59 | 0.19 |
| 8  | 230 | 1.5 | 0.44 | 2.11 | 0.82 | 2.48 | 1.05 | 6.90 | 0.19 |
| 9  | 250 | 1.5 | 0.54 | 2.49 | 0.83 | 1.87 | 0.94 | 6.67 | 0.19 |
| 10 | 270 | 1.5 | 0.38 | 1.13 | 0.27 | 0.93 | 0.29 | 3.0  | 0.08 |

**Tale S3. BTEX concentrations reported in the literature from the pyrolysis of ELTs**

| Type of waste tire                        | Pyrolysis conditions                                                                                                                     | Catalyst                                                                                                                      | Pyrolysis yields                                                                                                                                                                 | BTEX in the TPO                                                                                                                | Ref |
|-------------------------------------------|------------------------------------------------------------------------------------------------------------------------------------------|-------------------------------------------------------------------------------------------------------------------------------|----------------------------------------------------------------------------------------------------------------------------------------------------------------------------------|--------------------------------------------------------------------------------------------------------------------------------|-----|
| Truck tires                               | Reactor: Fixed-bed. Sample: 300g. Temperature: 800 °C. Heating rate: 15-25 °C/min                                                        | No catalyst                                                                                                                   | TPO: 44.7 wt%; TPG: 16.8 wt%; RRCB: 38.52 wt%                                                                                                                                    | Aromatics: 65.4 wt%                                                                                                            | RS1 |
| Passenger car tires                       | Reactor: Py-GC/MS. Sample: ~10 g. Temperature: 400-500 °C                                                                                | No catalyst                                                                                                                   | Yields predicted by mathematical models                                                                                                                                          | Optimum pyrolytic condition for yield of BTX (26.5 g per 100 g tire rubber)                                                    | RS2 |
| From a recycling plant                    | Reactor: Self-designed optical precision heat control device. Sample: 0.40 g. Temperature: 425 - 575 °C. Heating rates: 60 - 6000 °C/min | No catalytic                                                                                                                  | TPO yields in the range of 55-57 wt%                                                                                                                                             | Up to 41.5 area% with high heating rates                                                                                       | RS3 |
| Passenger cars                            | Reactor: Fixed bed. Temperature: 500 °C. Heating rate: 10 °C/min. Gas residence time: 30 s approx.)                                      | ZSM-5 (si/Al 40). Y-Zeolite (CBV-400). Y-Zeolite (CBV-780. Catalyst/feed ratio: 0-1.5                                         | TPO yields in the range of 32-33 wt%. Catalyst presence reduces TPO yield. Increasing catalyst/tire feed ratio decreases TPO yield further and increases gas and coke formation. | Toluene reached a maximum value in the oil of 24 wt.%, benzene 5 wt.%, m/p-xylenes 20 wt.% and o-xylene 7 wt.%. (Total= 56wt%) | RS4 |
| Origin not provided                       | Reactor: Fixed-bed. Sample: 1g. Temperature: 400-600 °C                                                                                  | Fe <sub>2</sub> O <sub>3</sub> , CuO, CaO. Addition ratios: 5, 10, and 15 % of metal oxide                                    | TPO: 48-50 wt% ; TPG: 9-12 wt%; RRCB: 39-40 wt%                                                                                                                                  | Fe <sub>2</sub> O <sub>3</sub> promotes cyclization and dehydrogenation to produce monoaromatics (57.4% relative area)         | RS5 |
| Sidewall rubber of automotive scrap tires | Reactor: Continuous stirred batch. Sample: 150g of scrap tires. Temperature: 430-500 °C. Heating rate: 15 °C/min                         | ZSM-5, USY, $\beta$ , SAPO-11, and ZSM-22. The catalytic pyrolysis was performed using 1.0 wt% (on a scrap tire weight basis) | HZSM-5: TPO: 55.65 wt%; TPG: 6.49 wt%; RRCB: 37.86 wt%. USY: TPO: 53.49 wt%; TPG: 9.97 wt%; RRCB: 36.54 wt%. $\beta$ zeolite: TPO: 54 wt%; TPG: 8.24 wt%; RRCB: 37.76 wt%        | HZSM-5: MAHs: 45.8 wt% (PAHs: 4.3 wt%). USY: MAHs: 45.4 wt% (PAHs: 3.4 wt%). $\beta$ zeolite: MAHs: 46.7 wt% (PAHs: 3.3 wt%)   | RS6 |
| Origin not                                | Reactor: Fixed bed. Sample: 30 g.                                                                                                        | Zeolites: KL,                                                                                                                 | TPO: 42-43 wt%; TPG:                                                                                                                                                             | MAHs = 44-45 wt%                                                                                                               | RS7 |

| Type of waste tire   | Pyrolysis conditions                                                                                                                                                                                                                                                                                                                                                                              | Catalyst                                                                                                                  | Pyrolysis yields                                                                                                                                                | BTEX in the TPO                                                                                                                                                                                                                                                                                                                               | Ref  |
|----------------------|---------------------------------------------------------------------------------------------------------------------------------------------------------------------------------------------------------------------------------------------------------------------------------------------------------------------------------------------------------------------------------------------------|---------------------------------------------------------------------------------------------------------------------------|-----------------------------------------------------------------------------------------------------------------------------------------------------------------|-----------------------------------------------------------------------------------------------------------------------------------------------------------------------------------------------------------------------------------------------------------------------------------------------------------------------------------------------|------|
| provided             | Temperature: 500 °C. Heating rate: 10 °C/min                                                                                                                                                                                                                                                                                                                                                      | HMOR, HBeta, HZSM-5, and HY                                                                                               | 11-13 wt%; RRCB: 41-43 wt%                                                                                                                                      |                                                                                                                                                                                                                                                                                                                                               |      |
| Small domestic cars  | <p><u>Initial Evaluation:</u><br/>Reactor: Pyroprobe coupled with GC/MS. Sample: 0.60 mg. Temperature: 500-800 °C. Residence time: 5-30 s. Atmospheres: He, CH<sub>4</sub>, H<sub>2</sub>, N<sub>2</sub>, O<sub>2</sub></p> <p><u>Catalytic Pyrolysis:</u><br/>Reactor: fixed-bed. Sample: 3g. Temperature: 750 °C. Heating rate: 500 °C/s. Carrier Gas: CH<sub>4</sub>. Residence time: 30 s</p> | Different zeolite catalysts. The catalysts were loaded in a quartz tube by mixing with the raw materials at 10 wt. %.     | The yields of pyrolysis products are not shown.                                                                                                                 | <p><u>Non-catalytic:</u> 40.91 % MAHs were obtained at 500 °C/s and 750 °C in helium atmosphere.</p> <p><u>Catalytic:</u> The H<math>\beta</math> catalyst is conducive to the formation of MAHs (up to 53.09 area %). The MCM-41Q catalyst is beneficial to the formation of BTEX (22.35 area %), as the content of MAHs was 46.09 area%</p> | RS8  |
| Origin not provided. | Reactor: Py-GC/MS. Sample: 1 mg. Temperature: 400-450 °C. Heating rate: 2000 °C/s                                                                                                                                                                                                                                                                                                                 | Noble metals (Pd, Pt, Au) supported on titanate nanotubes (NT-Ti). The catalysts to feedstocks mass ratio was held at 1:4 | The yields of pyrolysis products are not shown                                                                                                                  | The BTX production was enhanced by the presence of catalysts with a selectivity order as follows Pd > Pt $\approx$ Au > support > non-catalys. Values up to 50 area % of Monoaromatics                                                                                                                                                        | RS9  |
| Origin not provided  | Reactor: Two-staged pyrolysis–catalysis (fixed bed reactor). Sample: 10g. Temperature: 500 °C                                                                                                                                                                                                                                                                                                     | Y-type (USY) zeolite. Catalyst/tire ratios of 0.25, 0.5, 0.75 and 1.0                                                     | <p>Non-catalytic: TPO: 45.9 wt%; TPG: 16.5 wt%; RRCB: 37.59 wt%.</p> <p>TPO yield decreased as increasing the catalyst/tire ratio. Values lower than 30 wt%</p> | Values up to 63 wt% of BTEX (catalyst/tire ratio of 0.5)                                                                                                                                                                                                                                                                                      | RS10 |
| Origin not provided  | Reactor: CDS 5200 Pyroprobe coupled to GC/MS. Sample: 10g. Temperature: 350, 400, and 450 °C                                                                                                                                                                                                                                                                                                      | (Pd, Ni or Co)/SiO <sub>2</sub> . Metal catalysts based on Ni, Co, and Pd                                                 | The yields of pyrolysis products are not shown                                                                                                                  | BTX: Pd (30.1 %) > Ni (22.2 %) > Co (10.2 %) > non-catalyzed (8.8 %)                                                                                                                                                                                                                                                                          | RS11 |

| Type of waste tire  | Pyrolysis conditions                                                                                                                                            | Catalyst                                                                                                       | Pyrolysis yields                                      | BTEX in the TPO                                                                                                                                                                                        | Ref      |
|---------------------|-----------------------------------------------------------------------------------------------------------------------------------------------------------------|----------------------------------------------------------------------------------------------------------------|-------------------------------------------------------|--------------------------------------------------------------------------------------------------------------------------------------------------------------------------------------------------------|----------|
|                     |                                                                                                                                                                 | supported on SiO <sub>2</sub> ). Catalyst-to-tire ratio of 8:1                                                 |                                                       |                                                                                                                                                                                                        |          |
| Truck tire          | Reactor: Quartz Tube. Sample: 2 g. Temperature: 500 °C                                                                                                          | Metal-modified USY (Fe, Co, Ni, Cu, Zn). 2 g of waste tire and 0.4 g catalyst                                  | TPO yield decreased from 42 to 34 wt%, approximately. | The highest relative content of monoaromatics reached 63.70 relative area % over 1%Cu/USY (42.92 mg/g)                                                                                                 | RS1<br>2 |
| Origin not provided | Reactor: Tandem micro pyrolyzer (Rx-3050 TR) coupled with GC/MS. Sample: 1 mg. Temperature: 400-600 °C. Investigations: Zinc content and catalytic temperature. | RRCB and Zinc loaded RRCB was used as catalyst. Catalyst-to-tire ratio (5:1, 10:1, 15:1, 20:1, 25:1, and 30:1) | The yields of pyrolysis products are not shown        | BTEX yield which was 2.4 times higher than that from uncatalyzed case. The optimal TPO products were obtained at 600 °C with catalyst-to-tire ratio of 20. The relative content of BTEX reached 54.70% | RS1<br>3 |

**Table S4. Elemental and calorific analyses of the resulting heavy fraction**

| Run | Temp. Reboiler (°C) | RR  | Elemental composition, as received (wt%) |     |     |     | HCV (MJ/kg) |
|-----|---------------------|-----|------------------------------------------|-----|-----|-----|-------------|
|     |                     |     | C                                        | H   | N   | S   |             |
| 1   | 190                 | No  | 89.0                                     | 8.6 | 1.3 | 1.1 | 40.1        |
| 2   | 210                 | No  | 89.0                                     | 8.6 | 1.1 | 1.0 | 39.5        |
| 3   | 230                 | No  | 89.2                                     | 8.2 | 0.6 | 0.8 | 39.2        |
| 4   | 250                 | No  | 89.7                                     | 8.1 | 1.0 | 1.0 | 39.3        |
| 5   | 270                 | No  | 89.0                                     | 8.0 | 1.3 | 1.1 | 40.1        |
| 6   | 190                 | 1.5 | ---                                      | --- | --- | --- | ---         |
| 7   | 210                 | 1.5 | 89.1                                     | 8.2 | 1.5 | 1.0 | 39.3        |
| 8   | 230                 | 1.5 | 89.4                                     | 8.1 | 0.8 | 0.9 | 41.1        |
| 9   | 250                 | 1.5 | 89.1                                     | 8.0 | 1.4 | 1.0 | 41.4        |
| 10  | 270                 | 1.5 | 89.2                                     | 8.0 | 1.2 | 0.8 | 39.8        |

**Table S5. GC/MS results of the resulting heavy fraction**

| Run | Temp. Reboiler (°C) | RR  | BTEX   |         | Substituted Benzenes |         | Indanes, indenenes |         | Heterocyclic compounds |         | PAH    |         | Others |         | Total |
|-----|---------------------|-----|--------|---------|----------------------|---------|--------------------|---------|------------------------|---------|--------|---------|--------|---------|-------|
|     |                     |     | RA (%) | RSD (%) | RA (%)               | RSD (%) | RA (%)             | RSD (%) | RA (%)                 | RSD (%) | RA (%) | RSD (%) | RA (%) | RSD (%) |       |
| 1   | 190                 | No  | 40.2   | 2.0     | 36.0                 | 1.0     | 1.5                | 4.5     | 1.7                    | 3.2     | 19.2   | 1.4     | 1.3    | 3.5     | 100.0 |
| 2   | 210                 | No  | 32.4   | 2.5     | 40.3                 | 1.2     | 1.7                | 1.7     | 1.9                    | 1.5     | 22.2   | 1.2     | 1.6    | 1.2     | 100.0 |
| 3   | 230                 | No  | 29.6   | 1.4     | 46.8                 | 0.1     | 2.0                | 2.3     | 1.7                    | 2.8     | 18.1   | 1.4     | 1.7    | 0.4     | 100.0 |
| 4   | 250                 | No  | 9.1    | 1.4     | 27.6                 | 0.1     | 3.9                | 2.0     | 4.7                    | 0.8     | 52.9   | 0.3     | 1.7    | 0.7     | 100.0 |
| 5   | 270                 | No  | 3.0    | 3.0     | 21.0                 | 2.9     | 2.8                | 3.2     | 5.2                    | 6.1     | 65.6   | 1.5     | 2.3    | 2.2     | 100.0 |
| 6   | 190                 | 1.5 | ---    | ---     | ---                  | ---     | ---                | ---     | ---                    | ---     | ---    | ---     | ---    | ---     | ---   |
| 7   | 210                 | 1.5 | 19.7   | 0.3     | 39.7                 | 0.3     | 2.3                | 0.7     | 2.7                    | 9.8     | 33.8   | 0.5     | 1.8    | 1.9     | 100.0 |
| 8   | 230                 | 1.5 | 17.2   | 0.5     | 42.5                 | 0.0     | 2.4                | 0.3     | 2.9                    | 1.2     | 33.0   | 0.3     | 2.0    | 0.4     | 100.0 |
| 9   | 250                 | 1.5 | 16.3   | 0.5     | 38.8                 | 0.8     | 2.9                | 1.1     | 3.1                    | 2.3     | 37.0   | 0.8     | 2.0    | 1.3     | 100.0 |
| 10  | 270                 | 1.5 | 9.7    | 1.4     | 26.0                 | 0.5     | 2.4                | 2.5     | 4.0                    | 0.0     | 55.6   | 0.4     | 2.2    | 0.2     | 100.0 |

## Figures

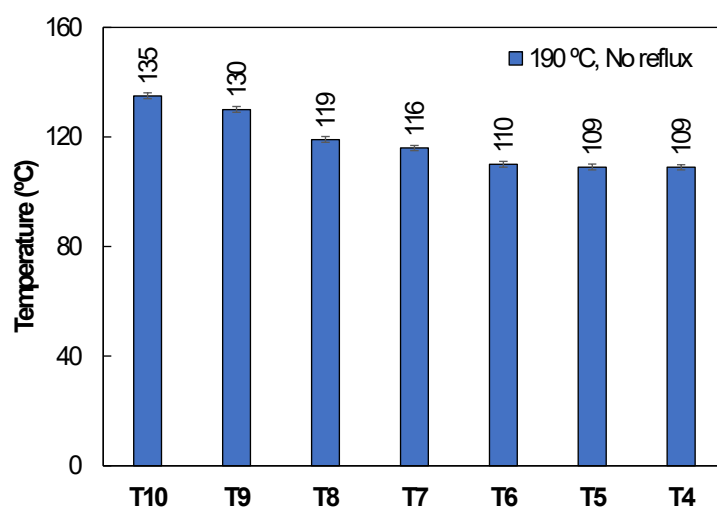

Fig. S1. Steady-state temperature profile of the column (run # 1)

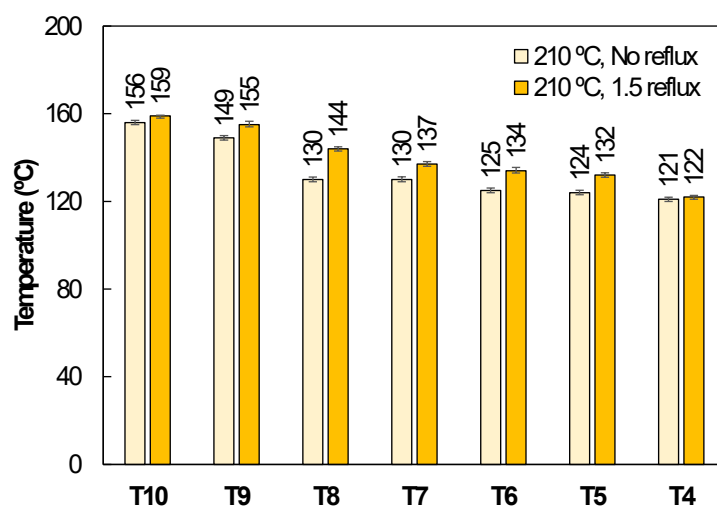

Fig. S2. Steady-state temperature profile of the column (runs 2 and 7)

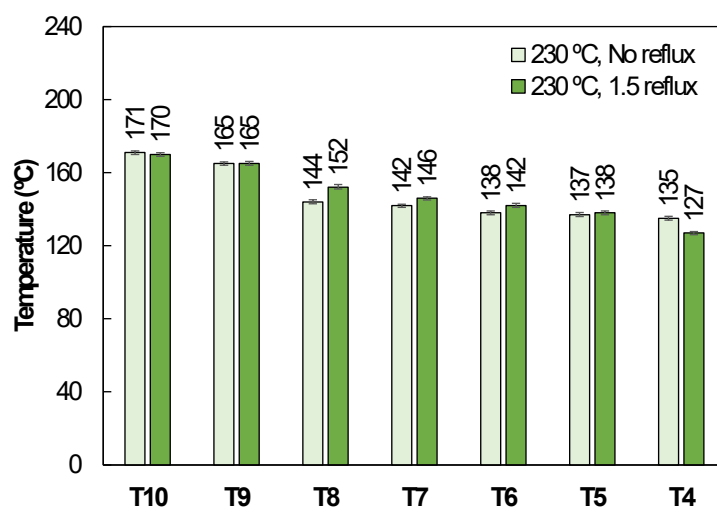

**Fig. S3. Steady-state temperature profile of the column (runs 3 and 8)**

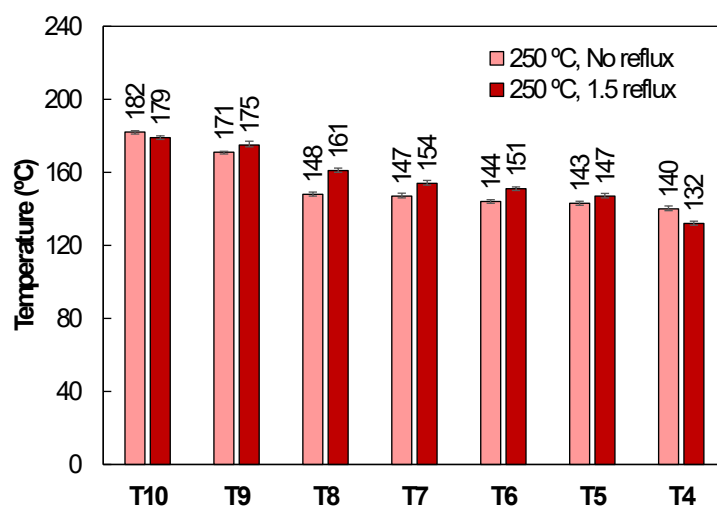

**Fig. S4. Steady-state temperature profile of the column (runs 4 and 9)**

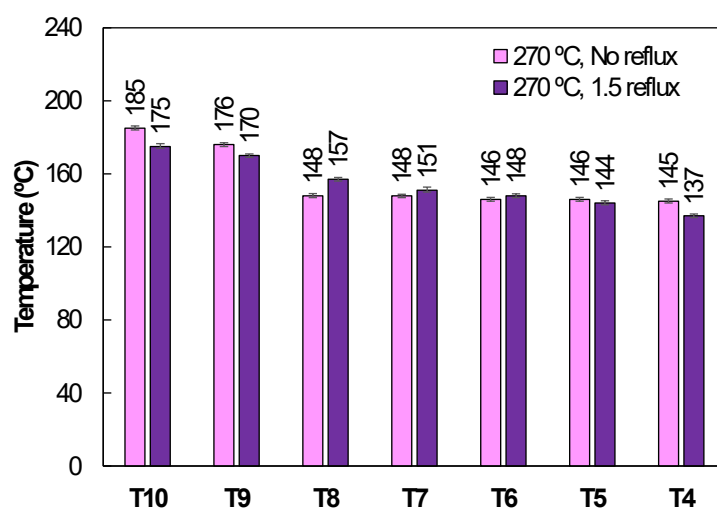

**Fig. S5. Steady-state temperature profile of the column (runs 5 and 10)**

## References

- [RS1] N Akkouche, M Balistrrou, K Loubar, S Awad, M Tazerout. Heating rate effects on pyrolytic vapors from scrap truck tires. *Journal of Analytical and Applied Pyrolysis* 2017, **123**, 419-429. <https://doi.org/10.1016/j.jaap.2016.10.005>
- [RS2] D Zheng, J Cheng, X Wang, G Yu, R Xu, C Dai, N Liu, N Wang, B Chen. Influences and mechanisms of pyrolytic conditions on recycling BTX products from passenger car waste tires. *Waste Management* 2023, **169**, 196-207. <https://doi.org/10.1016/j.wasman.2023.07.001>
- [RS3] H Wang, H Hu, Y Yang, H Liu, H Tang, S Xu, A Li, H Yao.. Effect of high heating rates on products distribution and sulfur transformation during the pyrolysis of waste tires. *Waste Management* 2020, **118**, 9-17. <https://doi.org/10.1016/j.wasman.2020.08.015>
- [RS4] PT Williams, AJ Brindle. Aromatic chemicals from the catalytic pyrolysis of scrap tyres. *Journal of Analytical and Applied Pyrolysis* 2003, **67(1)**, 143-164. [https://doi.org/10.1016/S0165-2370\(02\)00059-1](https://doi.org/10.1016/S0165-2370(02)00059-1)
- [RS5] H Jiang, J Zhang, J Shao, T Fan, J Li, F Agblevor, H Song, J Yu, H Yang, H Chen. Desulfurization and upgrade of pyrolytic oil and gas during waste tires pyrolysis: The role of metal oxides. *Waste Management* 2024, **182**, 44-54. <https://doi.org/10.1016/j.wasman.2024.04.020>
- [RS6] W Li, C H, D Li, P Huo, M Wang, L Han, G Chen, H Li, X Li, Y Wang, M Wang. Derived oil production by catalytic pyrolysis of scrap tires. *Chinese Journal of Catalysis* 2016, **37(4)**, 526-532. [https://doi.org/10.1016/S1872-2067\(15\)60998-6](https://doi.org/10.1016/S1872-2067(15)60998-6)
- [RS7] S Muenpol, R Yuwapornpanit, S Jitkarnka. Valuable petrochemicals, petroleum fractions, and sulfur compounds in oils derived from waste tyre pyrolysis using five commercial zeolites as catalysts: impact of zeolite properties. *Clean Technologies Environmental Policy* 2015, **17**, 1149–1159. <https://doi.org/10.1007/s10098-015-0935-8>
- [RS8] B Wang, Y Fu, H Zheng, D Zeng, R Xiao. Catalytic and noncatalytic fast pyrolysis of waste tires to produce high-value monocyclic aromatic hydrocarbons. *Journal of Analytical and Applied Pyrolysis* 2021, **156**, 105131. <https://doi.org/10.1016/j.jaap.2021.105131>
- [RS9] P Osorio-Vargas, CH Campos, CC Torres, C Herrera, K Shanmugaraj, TM Bustamante, JN Diaz de Leon, F Medina, LE Arteaga-Pérez. *Catalysis Today* 2022, **394–396**, 475-485. <https://doi.org/10.1016/j.cattod.2021.06.029>
- [RS10] S Boxiong, W Chunfei, L Cai, G Binbin, W Rui. Pyrolysis of waste tyres: The influence of USY catalyst/tyre ratio on products. *Journal of Analytical and Applied Pyrolysis* 2007, **78 (2)**, 243-249. <https://doi.org/10.1016/j.jaap.2006.07.004>
- [RS11] P Osorio-Vargas, T Menares, ID Lick, ML Casella, R Romero, R Jiménez, LE Arteaga-Pérez. Tuning the product distribution during the catalytic pyrolysis of waste tires: The effect of the nature of metals and the reaction temperature. *Catalysis Today* 2021, **372**, 164-174. <https://doi.org/10.1016/j.cattod.2020.10.035>
- [RS12] Y Hong, J Guan, C Liang, D He, Y Fan, L Wang, F Nie, J Liu, Q Zhang. Catalytic fast pyrolysis of waste truck-tire to aromatics production over metal-modified USY catalysts. *Journal of Analytical and Applied Pyrolysis* 2023, **174**, 106127. <https://doi.org/10.1016/j.jaap.2023.106127>
- [RS13] Y Pan, J Sima, X Wang, Y Zhou, Q Huang. BTEX recovery from waste rubbers by catalytic pyrolysis over Zn loaded tire derived char. *Waste Management* 2021, **131**, 214-225. <https://doi.org/10.1016/j.wasman.2021.06.013>
